# Supplementary material
Source: ML conference proceedings conference paper supplement (https://openreview.net/forum?id=FFM_oJeqZx)
Supplement: supplementary_material [file attachment]

## A ENTROPY OF STUDENT'S T-DISTRIBUTION

While the entropy of the Student t-distribution is well known, we derive it for completeness. Student's probability distribution defined in terms of location  $\gamma$ , scale factor  $\sigma_{st}^2$  and  $\nu_{st}$  degrees of freedom is

$$p(y; \gamma, \sigma_{st}^2, \nu_{st}) = \text{St}(y; \gamma, \sigma_{st}^2, \nu_{st}) = \frac{\Gamma(\frac{\nu_{st}+1}{2})}{\sqrt{\nu_{st}\pi}\sigma_{st}^2 \Gamma(\frac{\nu_{st}}{2})} \left(1 + \frac{1}{\nu_{st}} \frac{(y-\gamma)^2}{\sigma_{st}^2}\right)^{-\frac{\nu_{st}+1}{2}}, \quad (13)$$

where  $\Gamma$  is a gamma function. Student's t-distribution can be written in terms of beta function  $B = \frac{\Gamma(x)\Gamma(y)}{\Gamma(x+y)}$  if we take advantage of the fact that  $\Gamma(\frac{1}{2}) = \sqrt{\pi}$

$$p(y; \sigma_{st}^2, \nu_{st}) = \text{St}(y; \sigma_{st}^2, \nu_{st}) = \frac{1}{\sqrt{\nu_{st}\sigma_{st}^2} B(\frac{1}{2}, \frac{\nu_{st}}{2})} \left(1 + \frac{1}{\nu_{st}} \frac{(y-\gamma)^2}{\sigma_{st}^2}\right)^{-\frac{\nu_{st}+1}{2}}. \quad (14)$$

If we introduce a new variable  $t = \frac{y-\gamma}{\sigma_{st}}$ , Student's t-distribution converts into the standard form with probability density

$$p(t; \nu_{st}) = \text{St}(y; \nu_{st}) = \frac{1}{\sqrt{\nu_{st}} B(\frac{1}{2}, \frac{\nu_{st}}{2})} \left(1 + \frac{t^2}{\nu_{st}}\right)^{-\frac{\nu_{st}+1}{2}}. \quad (15)$$

### A.1 PROPOSITION

**Proposition:** Entropy of the generalized and standard Student's t-distributions are related via the formula

$$\mathcal{H}(y; \sigma_{st}^2, \nu_{st}) = \mathcal{H}(t; \nu_{st}) + \frac{1}{2} \log \sigma_{st}^2. \quad (16)$$

**Proof:** The transformation  $t = g(y) = \frac{y-\gamma}{\sigma_{st}}$  is bijective and invertible with the inverse transformation  $y = g^{-1}(t) = \sigma_{st} t + \gamma$ . The Jacobin of the transformation  $g^{-1}$  is  $J = \sigma_{st}$ . According to the change of variable probability density formula

$$p_y(y; \sigma_{st}^2, \nu_{st}) = p_t(g(y); \nu_{st}) \left| \frac{d}{dy} g(y) \right|. \quad (17)$$

Entropy transformation [16] follows directly from the definition of the entropy.

To find the generalized entropy, we just need to calculate the Shannon entropy of the standard Student's t-distribution

$$\mathcal{H}(t; \nu_{st}) = - \int_{-\infty}^{+\infty} p(t; \nu_{st}) \log p(t; \nu_{st}) dt = \quad (18)$$

$$\log \left( \sqrt{\nu_{st}} B\left(\frac{1}{2}, \frac{\nu_{st}}{2}\right) \right) \int_{-\infty}^{+\infty} p(t; \nu_{st}) dt + \quad (19)$$

$$\frac{\nu_{st}+1}{2} \int_{-\infty}^{+\infty} \log \left(1 + \frac{t^2}{\nu_{st}}\right) p(t; \nu_{st}) dt = \log \left( \sqrt{\nu_{st}} B\left(\frac{1}{2}, \frac{\nu_{st}}{2}\right) \right) + \quad (20)$$

$$\frac{\nu_{st}+1}{2} \int_{-\infty}^{+\infty} \log \left(1 + \frac{t^2}{\nu_{st}}\right) p(t; \nu_{st}) dt. \quad (21)$$

To find the second integral we make a substitution  $x = \frac{t^2}{\nu_{st}}$  and obtain

$$\frac{\nu_{st}+1}{2} \int_{-\infty}^{+\infty} \log \left(1 + \frac{t^2}{\nu_{st}}\right) p(t; \nu_{st}) dt = \frac{\nu_{st}+1}{4 B(\frac{1}{2}, \frac{\nu_{st}}{2})} \int_0^{+\infty} \log(1+x) (1+x)^{-\frac{\nu_{st}+1}{2}} \frac{dx}{\sqrt{x}} = \quad (22)$$

$$- \frac{\nu_{st}+1}{2 B(\frac{1}{2}, \frac{\nu_{st}}{2})} \frac{\partial}{\partial \nu_{st}} \int_0^{+\infty} (1+x)^{-\frac{\nu_{st}+1}{2}} \frac{dx}{\sqrt{x}} = - \frac{\nu_{st}+1}{2 B(\frac{1}{2}, \frac{\nu_{st}}{2})} \frac{\partial}{\partial \nu_{st}} \int_0^1 x^{\frac{\nu_{st}}{2}-1} (1-x)^{\frac{1}{2}-1} dx = \quad (23)$$

$$- \frac{\nu_{st}+1}{2 B(\frac{1}{2}, \frac{\nu_{st}}{2})} \frac{\partial}{\partial \nu_{st}} B\left(\frac{1}{2}, \frac{\nu_{st}}{2}\right) = - \frac{\nu_{st}+1}{2} \frac{\partial}{\partial \nu_{st}} \log B\left(\frac{1}{2}, \frac{\nu_{st}}{2}\right) = \quad (24)$$

$$- \frac{\nu_{st}+1}{2} \frac{\partial}{\partial \nu_{st}} \left( \log \Gamma\left(\frac{\nu_{st}}{2}\right) - \log \Gamma\left(\frac{\nu_{st}+1}{2}\right) \right) = \frac{\nu_{st}+1}{2} \left( \Psi\left(\frac{\nu_{st}+1}{2}\right) - \Psi\left(\frac{\nu_{st}}{2}\right) \right) \quad (25)$$

where digamma function is defined as  $\Psi(x) = \frac{\Gamma'(x)}{\Gamma(x)}$ . Putting all the terms together, the entropy of the Student's t-distribution becomes

$$\mathcal{H}(t; \nu_{st}) = \frac{\nu_{st} + 1}{2} \left( \Psi\left(\frac{\nu_{st} + 1}{2}\right) - \Psi\left(\frac{\nu_{st}}{2}\right) \right) + \log \left( \sqrt{\nu_{st}} B\left(\frac{1}{2}, \frac{\nu_{st}}{2}\right) \right) \quad (26)$$

The Shannon entropy of the random variable  $t$  is

$$\mathcal{H}(t; \nu_{st}) = \frac{\nu_{st} + 1}{2} \left( \Psi\left(\frac{\nu_{st} + 1}{2}\right) - \Psi\left(\frac{\nu_{st}}{2}\right) \right) + \log \left( \sqrt{\nu_{st}} B\left(\frac{1}{2}, \frac{\nu_{st}}{2}\right) \right) \quad (27)$$

and the Shannon entropy of the labels  $y$  is given by our final formula

$$\mathcal{H}(y; \sigma_{st}^2, \nu_{st}) = \frac{\nu_{st} + 1}{2} \left( \Psi\left(\frac{\nu_{st} + 1}{2}\right) - \Psi\left(\frac{\nu_{st}}{2}\right) \right) + \log \left( \sqrt{\nu_{st}} B\left(\frac{1}{2}, \frac{\nu_{st}}{2}\right) \right) + \frac{1}{2} \log \sigma_{st}^2. \quad (28)$$
